# Supplementary material for: Prediction Model for 30-Day Mortality after Non-Cardiac Surgery Using Machine-Learning Techniques Based on Preoperative Evaluation of Electronic Medical Records
Source: MDPI journal article supplement (doi:10.3390/jcm11216487), 2022-11-01
Supplement: s1 [file s1]

**Supplementary Table S1.** Baseline characteristics of external validation dataset (Ajou University Medical Center)

|                                                  | Missing | Overall      | No death     | Death             | P value |
|--------------------------------------------------|---------|--------------|--------------|-------------------|---------|
| n                                                |         | 63384        | 63169        | 215               |         |
| Male, n (%)                                      |         | 31777 (50.1) | 31638 (50.1) | 139 (64.7)        | <0.001  |
| ASA Class 1, n (%)                               |         | 41642 (65.7) | 41624 (65.9) | 18 (8.4)          | <0.001  |
| ASA Class 2, n (%)                               |         | 16983 (26.8) | 16933 (26.8) | 50 (23.3)         | 0.273   |
| ASA Class 3, n (%)                               |         | 2198 (3.5)   | 2142 (3.4)   | 56 (26.0)         | <0.001  |
| ASA Class 4, n (%)                               |         | 45 (0.1)     | 35 (0.1)     | 10 (4.7)          | <0.001  |
| ASA Class 5, n (%)                               |         | 13 (0.0)     | 11 (0.0)     | 2 (0.9)           | 0.001   |
| ASA Class 6, n (%)                               |         | 6 (0.0)      | 1 (0.0)      | 5 (2.3)           | <0.001  |
| ASA Class E, n (%)                               |         | 2300 (3.6)   | 2226 (3.5)   | 74 (34.4)         | <0.001  |
| Cerebrovasuclar disease, n (%)                   |         | 2456 (3.9)   | 2445 (3.9)   | 11 (5.1)          | 0.443   |
| Coronary artery disease, n (%)                   |         | 2603 (4.1)   | 2590 (4.1)   | 13 (6.0)          | 0.206   |
| Pregant, n (%)                                   |         | 1347 (2.1)   | 1347 (2.1)   |                   | 0.065   |
| Respiratory difficulty, n (%)                    |         | 122 (0.2)    | 120 (0.2)    | 2 (0.9)           | 0.016   |
| Chest pain, n (%)                                |         | 197 (0.3)    | 195 (0.3)    | 2 (0.9)           | 0.144   |
| Cough, n (%)                                     |         | 99 (0.2)     | 99 (0.2)     |                   | 1       |
| Wheezing, n (%)                                  |         | 0 (0.0)      | 0 (0.0)      |                   | 1       |
| Age, mean (SD)                                   | 0       | 41.8 (21.7)  | 41.8 (21.7)  | 55.6 (19.9)       | <0.001  |
| Weight, mean (SD)                                | 3714    | 58.6 (23.2)  | 58.6 (23.3)  | 60.6 (16.0)       | 0.158   |
| Height, mean (SD)                                | 5622    | 156.3 (24.0) | 156.3 (24.1) | 162.1 (15.6)      | <0.001  |
| Systolic blood pressure, mean (SD)               | 0       | 123.9 (20.3) | 124.0 (20.2) | 114.8 (39.2)      | 0.001   |
| Diastolic blood pressure, mean (SD)              | 0       | 77.2 (27.8)  | 77.2 (27.8)  | 65.4 (23.0)       | <0.001  |
| Pulse rate, mean (SD)                            | 0       | 81.9 (28.4)  | 81.9 (28.4)  | 95.6 (32.3)       | <0.001  |
| Respiratory rate, mean (SD)                      | 0       | 20.6 (15.2)  | 20.6 (15.1)  | 22.0 (25.4)       | 0.432   |
| Temperature, mean (SD)                           | 0       | 36.7 (1.7)   | 36.7 (1.6)   | 35.4 (5.5)        | <0.001  |
| Albumin, mean (SD)                               | 2833    | 3.8 (0.6)    | 3.8 (0.6)    | 3.0 (0.9)         | <0.001  |
| Alanine aminotrasnferase, mean (SD)              | 3041    | 35.5 (71.7)  | 34.7 (58.1)  | 166.8<br>(530.2)  | 0.001   |
| Activated partial thromboplastin time, mean (SD) | 6256    | 36.4 (14.9)  | 35.6 (12.6)  | 61.6 (38.4)       | 0.002   |
| Asparate aminotrasnferase, mean (SD)             | 3041    | 45.9 (130.2) | 44.3 (78.2)  | 310.3<br>(1322.6) | 0.005   |
| Blood urea nitrogen, mean (SD)                   | 3049    | 12.9 (7.2)   | 12.9 (7.1)   | 19.6 (13.7)       | <0.001  |
| Creatinine, mean (SD)                            | 4983    | 0.9 (0.8)    | 0.9 (0.8)    | 1.3 (1.4)         | <0.001  |
| Glucose, mean (SD)                               | 3140    | 129.7 (45.6) | 129.3 (45.0) | 191.0 (90.5)      | <0.001  |
| Hemoglobin, mean (SD)                            | 4034    | 12.2 (1.9)   | 12.2 (1.9)   | 10.6 (2.8)        | <0.001  |
| Hematocrit, mean (SD)                            | 2473    | 36.1 (5.6)   | 36.1 (5.6)   | 32.0 (8.3)        | <0.001  |
| International normalized ratio, mean (SD)        | 4573    | 1.1 (0.2)    | 1.1 (0.2)    | 1.5 (0.7)         | <0.001  |
| Platelet, mean (SD)                              | 2645    | 217.3 (79.5) | 217.7 (79.4) | 156.9 (90.3)      | <0.001  |
| Potassium, mean (SD)                             | 3077    | 4.0 (0.5)    | 4.0 (0.5)    | 4.0 (0.9)         | 0.857   |
| Sodium, mean (SD)                                | 3077    | 139.5 (2.9)  | 139.5 (2.9)  | 140.8 (6.3)       | 0.003   |
