# Supplementary material for: Prediction Model for 30-Day Mortality after Non-Cardiac Surgery Using Machine-Learning Techniques Based on Preoperative Evaluation of Electronic Medical Records
Source: MDPI journal article supplement (doi:10.3390/jcm11216487), 2022-11-01
Supplement: s1 [file s1]

**Supplementary Table S2.** Performance Metrics of Models

|                           | AUROC | AUPRC |
|---------------------------|-------|-------|
| Extreme gradient boosting | 0.960 | 0.216 |
| Logistic Regression       | 0.851 | 0.070 |
| Random Forest             | 0.888 | 0.149 |
| Naive Bayes               | 0.867 | 0.105 |

AUROC: area under the receiver operating characteristic curve, AUPRC: area under the precision and recall curve.
